# Supplementary material for: The Impact of Kidney Transplantation on the Serum Fatty Acid Profile in Patients with End-Stage Kidney Disease
Source: MDPI journal article supplement (doi:10.3390/nu14040772), 2022-02-12
Supplement: s1 [file s1]

## Article

# The Impact of Kidney Transplantation on the Serum Fatty Acid Profile in Patients with End-Stage Kidney Disease

Maciej Śledziński <sup>1</sup>, Aleksandra Hliwa <sup>2</sup>, Justyna Gołębowska <sup>3</sup>, and Adriana Mika <sup>2,\*</sup>
<sup>1</sup> Department of General, Endocrine and Transplant Surgery, Faculty of Medicine, Medical University of Gdansk, 80-214 Gdansk, Poland; msledz@gumed.edu.pl

<sup>2</sup> Department of Pharmaceutical Biochemistry, Faculty of Pharmacy, Medical University of Gdansk, 80-211 Gdansk, Poland; aleksandra.hliwa@gumed.edu.pl, adriana.mika@gumed.edu.pl

<sup>3</sup> Department of Nephrology, Transplantology and Internal Medicine, Medical University of Gdansk, 80-211 Gdansk, Poland; jgolebowska@gumed.edu.pl

\* Correspondence: adriana.mika@gumed.edu.pl

**Supplementary Table S1.** Individual fatty acid content (%) in patient's serum before and 3 months after kidney transplantation. Values are mean  $\pm$  SEM.

|      | PreKTx            | 3m post KTx       | p     |
|------|-------------------|-------------------|-------|
| 10:0 | 0.010 $\pm$ 0.000 | 0.013 $\pm$ 0.001 | 0.333 |
| 12:0 | 0.21 $\pm$ 0.02   | 0.16 $\pm$ 0.01   | 0.048 |
| 14:0 | 1.27 $\pm$ 0.08   | 1.33 $\pm$ 0.09   | 0.591 |
| 16:0 | 22.5 $\pm$ 0.27   | 23.3 $\pm$ 0.29   | 0.025 |
| 18:0 | 7.28 $\pm$ 0.20   | 6.77 $\pm$ 0.20   | 0.041 |
| 20:0 | 0.11 $\pm$ 0.01   | 0.12 $\pm$ 0.01   | 0.077 |
| 22:0 | 0.20 $\pm$ 0.01   | 0.19 $\pm$ 0.01   | 0.456 |
| 24:0 | 0.22 $\pm$ 0.01   | 0.20 $\pm$ 0.01   | 0.159 |
| 26:0 | 0.030 $\pm$ 0.002 | 0.022 $\pm$ 0.002 | 0.006 |
| 28:0 | 0.027 $\pm$ 0.003 | 0.021 $\pm$ 0.002 | 0.207 |
| 30:0 | 0.025 $\pm$ 0.003 | 0.021 $\pm$ 0.001 | 0.337 |
| 32:0 | 0.012 $\pm$ 0.001 | 0.012 $\pm$ 0.001 | 1.000 |
| 11:0 | 0.009 $\pm$ 0.001 | 0.003 $\pm$ 0.001 | 0.058 |
| 13:0 | 0.013 $\pm$ 0.001 | 0.013 $\pm$ 0.001 | 0.676 |
| 15:0 | 0.34 $\pm$ 0.02   | 0.32 $\pm$ 0.01   | 0.348 |
| 17:0 | 0.31 $\pm$ 0.01   | 0.29 $\pm$ 0.01   | 0.086 |
| 19:0 | 0.020 $\pm$ 0.001 | 0.020 $\pm$ 0.001 | 1.000 |
| 21:0 | 0.018 $\pm$ 0.002 | 0.016 $\pm$ 0.001 | 0.303 |
| 23:0 | 0.068 $\pm$ 0.005 | 0.067 $\pm$ 0.004 | 0.906 |
| 25:0 | 0.051 $\pm$ 0.005 | 0.050 $\pm$ 0.010 | 0.890 |
| 14:1 | 0.061 $\pm$ 0.007 | 0.073 $\pm$ 0.009 | 0.273 |
| 16:1 | 3.31 $\pm$ 0.15   | 3.16 $\pm$ 0.15   | 0.136 |

|                |               |               |        |
|----------------|---------------|---------------|--------|
| 18:1           | 28.0 ± 0.49   | 28.5 ± 0.54   | 0.342  |
| 19:1           | 0.014 ± 0.001 | 0.015 ± 0.001 | 0.689  |
| 20:1           | 0.14 ± 0.009  | 0.16 ± 0.008  | 0.016  |
| 22:1           | 0.019 ± 0.002 | 0.020 ± 0.002 | 0.594  |
| 24:1           | 0.27 ± 0.02   | 0.29 ± 0.02   | 0.262  |
| 16:2n-6        | 0.011 ± 0.004 | 0.012 ± 0.004 | 0.423  |
| 18:2n-6 (LA)   | 24.1 ± 3.89   | 25.4 ± 3.46   | 0.020  |
| 20:2n-6        | 0.12 ± 0.04   | 0.14 ± 0.04   | 0.123  |
| 20:3n-6 (DGLA) | 1.20 ± 0.40   | 0.87 ± 0.32   | <0.001 |
| 20:4n-6 (ARA)  | 6.33 ± 1.39   | 5.15 ± 1.07   | <0.001 |
| 22:4n-6 (AdA)  | 0.16 ± 0.04   | 0.13 ± 0.04   | <0.001 |
| 18:3n-3 (ALA)  | 0.29 ± 0.13   | 0.24 ± 0.16   | 0.094  |
| 20:4n-3 (ETA)  | 0.078 ± 0.023 | 0.061 ± 0.030 | <0.001 |
| 20:5n-3 (EPA)  | 0.74 ± 0.25   | 0.73 ± 0.43   | 0.916  |
| 22:5n-3 (DPA)  | 0.44 ± 0.10   | 0.38 ± 0.079  | 0.007  |
| 22:6n-3 (DHA)  | 1.51 ± 0.51   | 1.24 ± 0.45   | 0.001  |

Pre KTx - just before kidney transplant surgery, 3m post KTx - 3 months after kidney transplantation. AdA-adrenic acid, ARA-arachidonic acid, BCFA-branched chain fatty acids, DGLA-dihomo-linolenic acid, DHA-docosahexaenoic acid, DI-desaturation index (18:1/18:0), DPA-docosapentaenoic acid, ECFA-even chain fatty acids, EPA-eicosapentaenoic acid, ETA-eicosatetraenoic acid, MUFA-monounsaturated fatty acids, OCFA-odd chain fatty acids, PUFA-polyunsaturated fatty acids, SFA-saturated fatty acids.
